# Supplementary material for: eEF2K as an important kinase associated with cancer survival and prognosis
Source: Springer Nature journal article supplement (doi:10.1038/s41598-024-78652-4), 2024-11-26
Supplement: MOESM1 [file 41598_2024_78652_MOESM1_ESM.pdf]

1

2

3

4

5

A

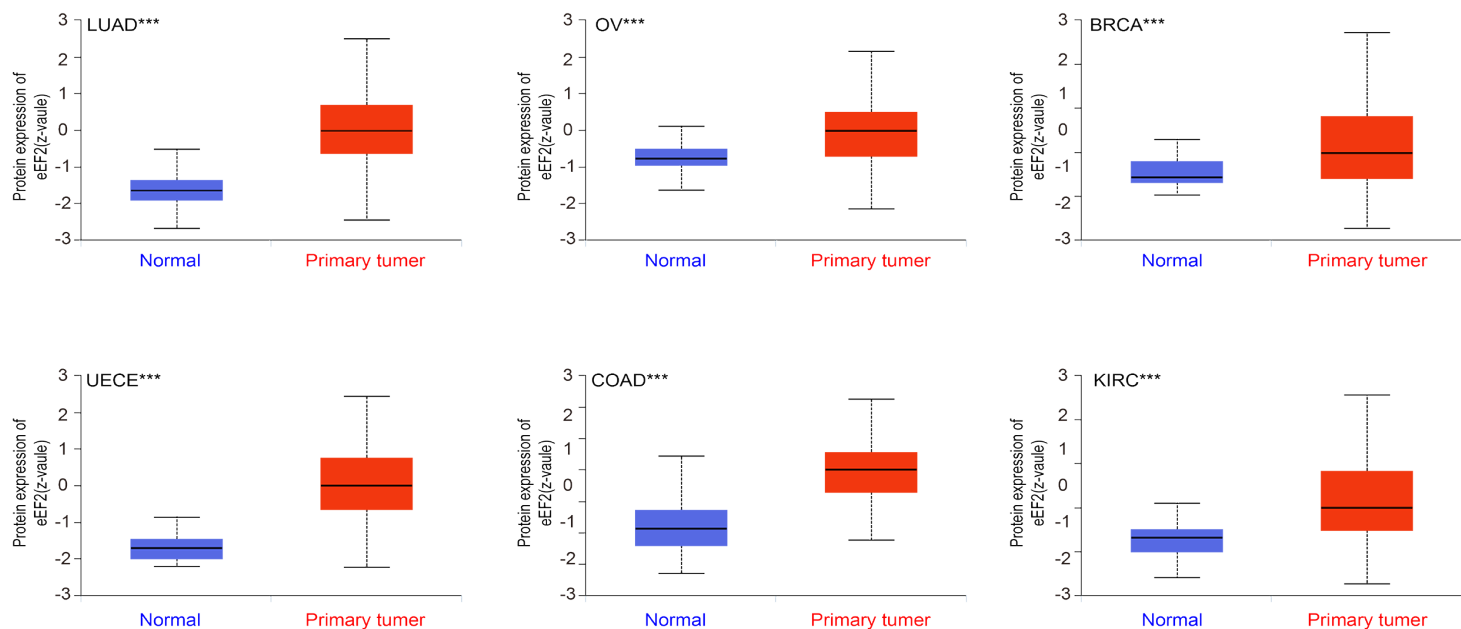

B

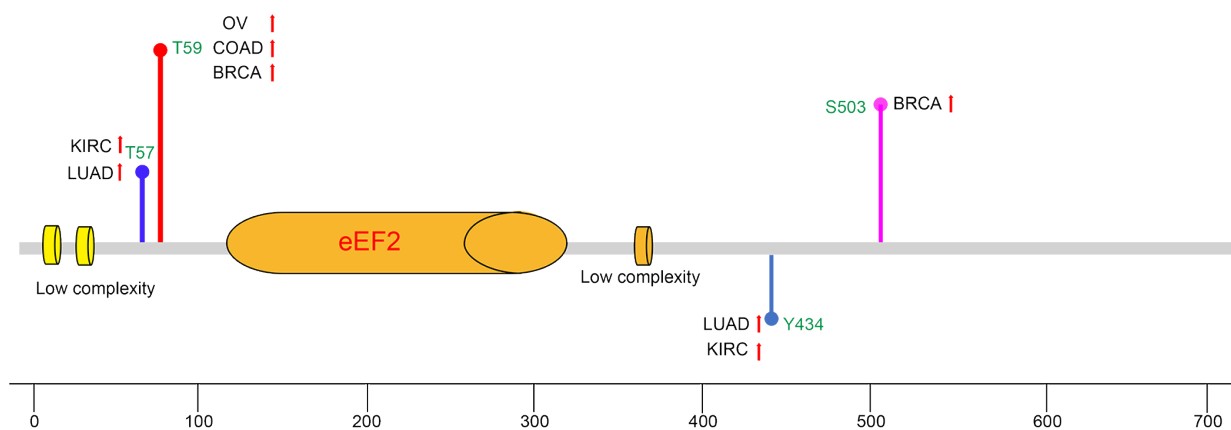

C

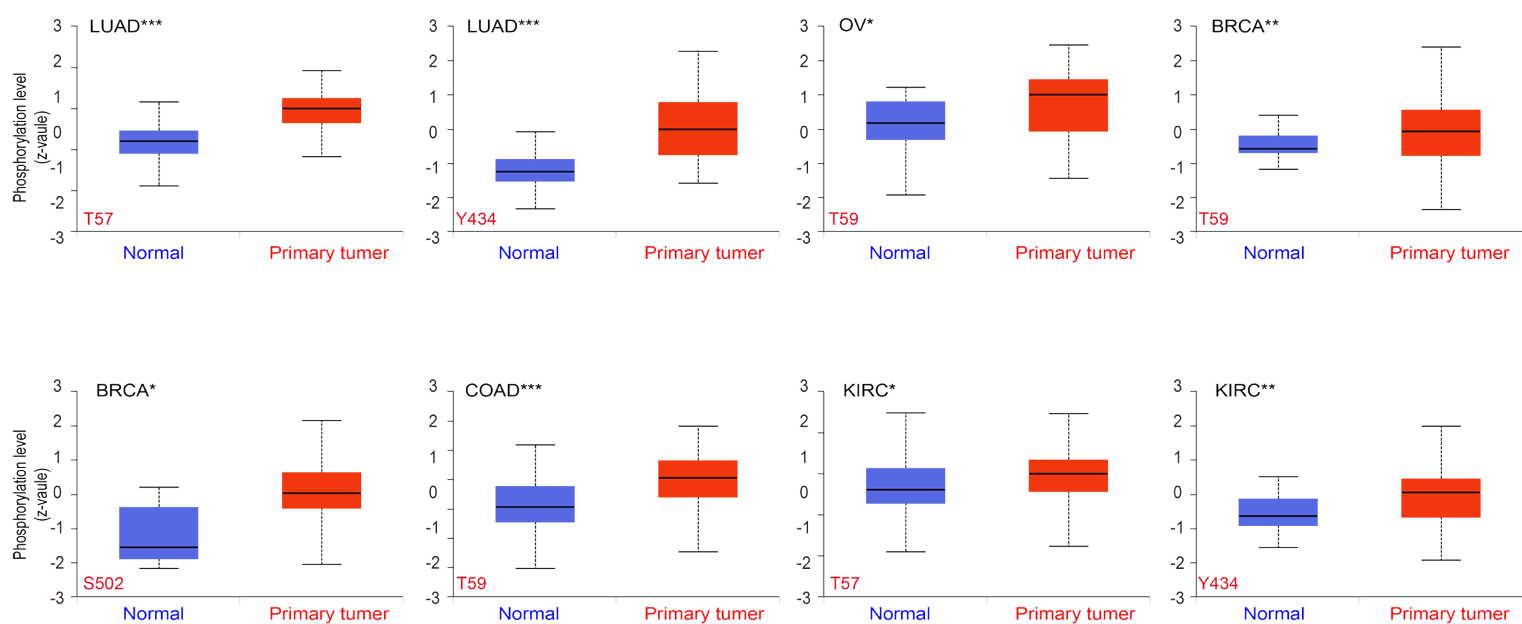

6 **Figure S1.** Expression levels of eEF2 total protein and phosphorylation at specific sites in various  
7 cancer types. (A) Analysis of eEF2 total protein expression levels in LUAD, OV, BRCA, UCEC,  
8 COAD, KIRC primary tumor tissues compared to normal tissues. (B) Schematic diagram of  
9 eEF2 protein domain showing 5 tumor diseases at each phosphorylation site. (C)  
10 Phosphorylation levels of eEF2 at T57, T59, S502, and Y434 sites in COAD, OV, KIRC, LUAD,  
11 and BRCA primary tumors and corresponding normal tissues. Statistical significance is indicated:  
12 \*p < 0.05; \*\*p < 0.01; \*\*\*p < 0.001.  
13
